# Supplementary material
Source: PubMed Central journal article supplement (PMC9253133)
Supplement: 41422_2022_672_MOESM2_ESM.pdf [file 41422_2022_672_MOESM2_ESM.pdf]

# Supplementary information, Fig. S2

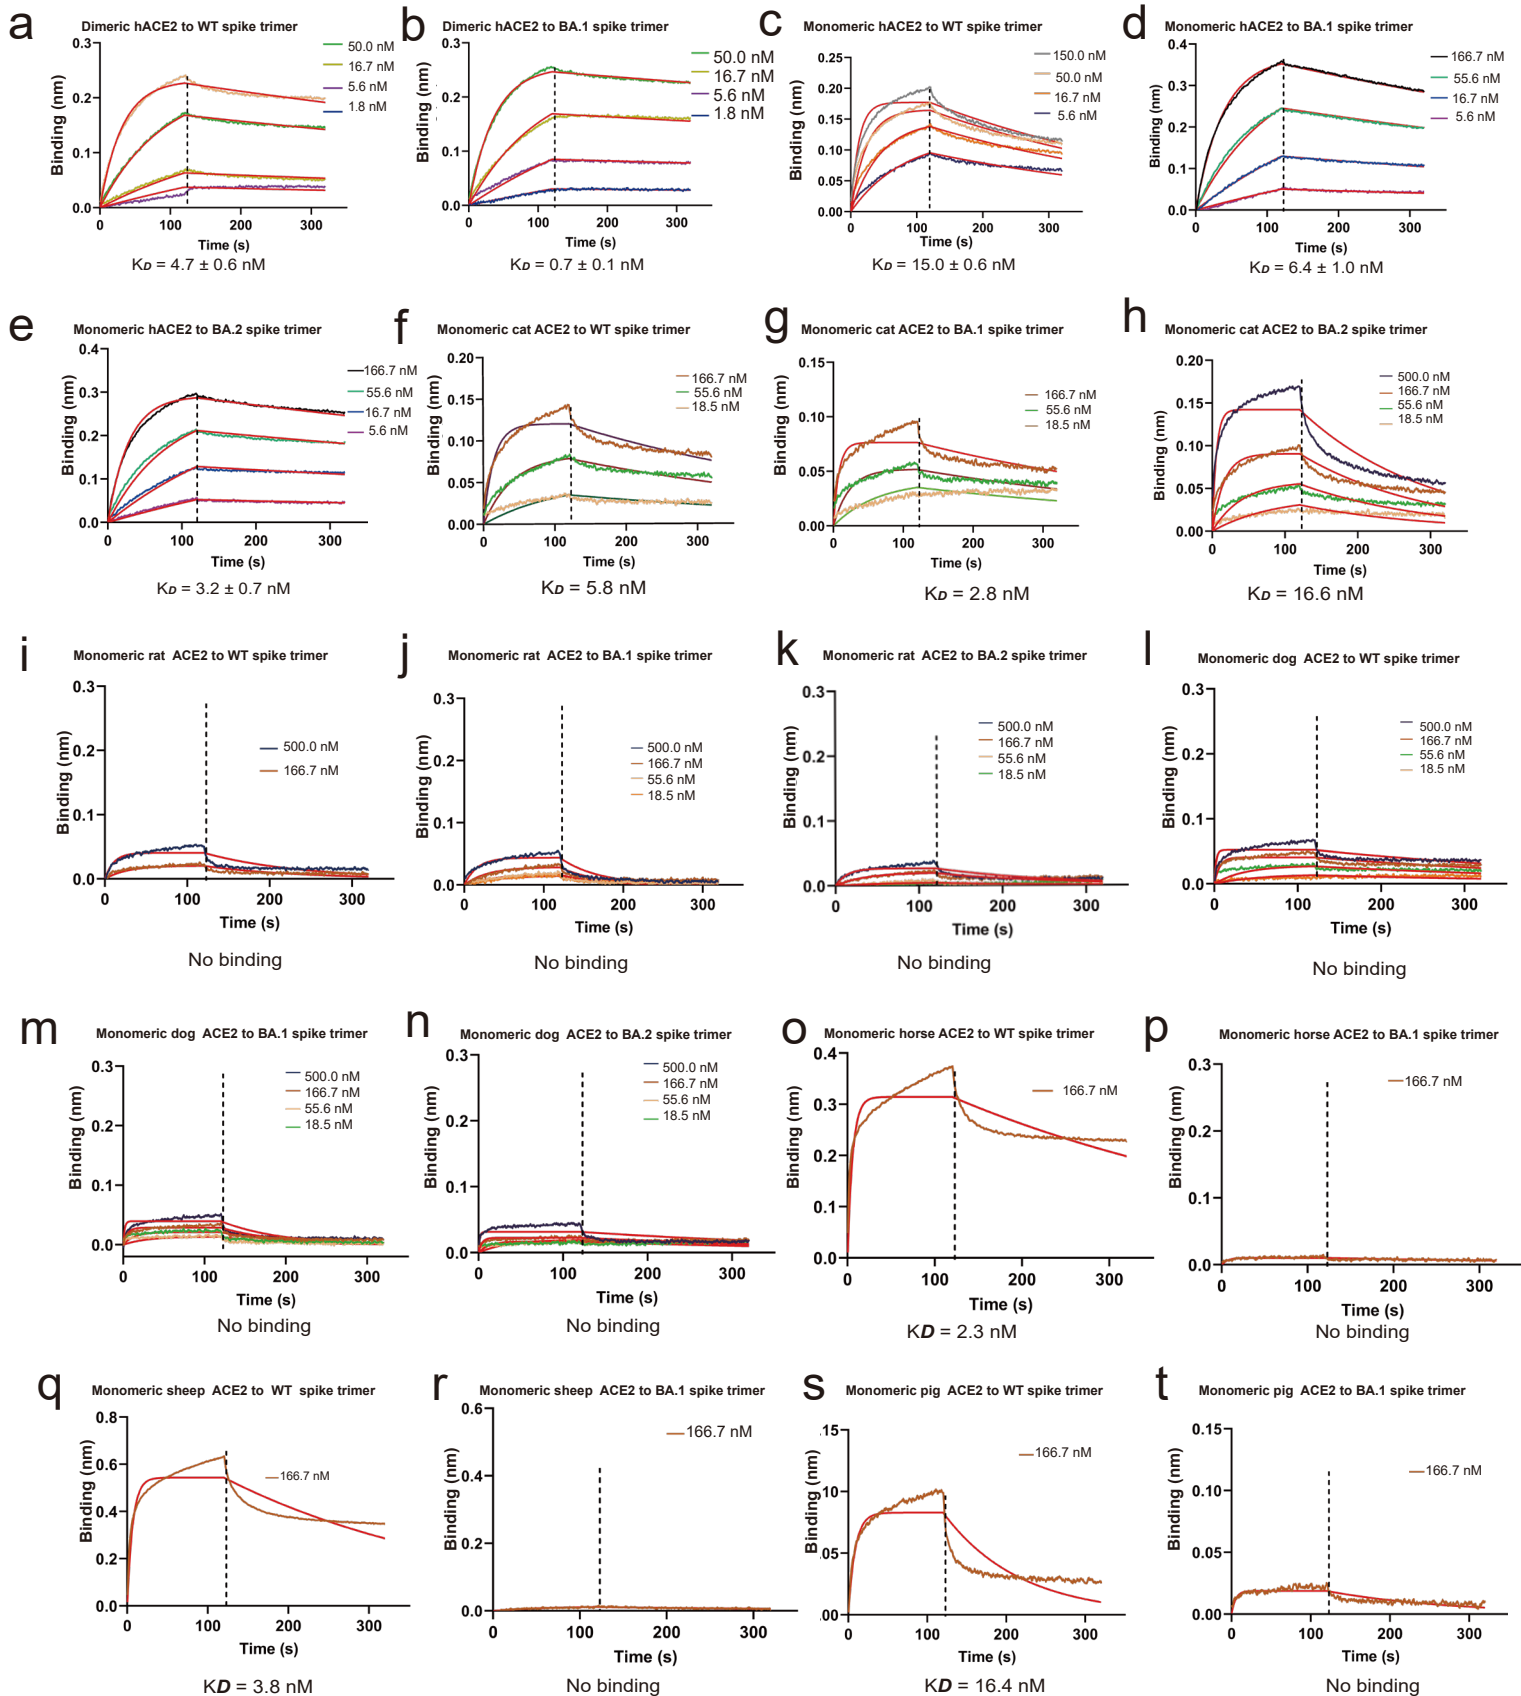

**Fig. S2. Binding affinities of ACE2 from different species to spike protein from different strains**

(a and b) Binding of dimeric hACE2 to WT (a) and BA.1 (b) spike trimer; (c-e) binding of monomeric human ACE2 to WT (c), BA.1 (d) and BA.2 (e) spike trimer; (f-h) binding of monomeric cat ACE2 to WT (f), BA.1 (g) and BA.2 (h) spike trimer; (i-k) binding of monomeric rat ACE2 to WT (i), BA.1 (j) and BA.2 (k) spike trimer; (l-n) binding of monomeric dog ACE2 to WT (l), BA.1 (m) and BA.2 (n) spike trimer; (o and p) binding of monomeric horse ACE2 to WT (o) and BA.1 (p) spike trimer; (q and r) binding of monomeric sheep ACE2 to WT (q) and BA.1 (r) spike trimer; (s and t) binding of monomeric pig ACE2 to WT (s) and BA.1 (t) spike trimer. These data are determined by BLI. The  $K_D$  values are further determined with Octet Data Analysis HT 11.0 software using a 1:1 global fit model.
