# Supplementary material
Source: PubMed Central journal article supplement (PMC9253133)
Supplement: 41422_2022_672_MOESM3_ESM.pdf [file 41422_2022_672_MOESM3_ESM.pdf]

# Supplementary information, Fig. S3

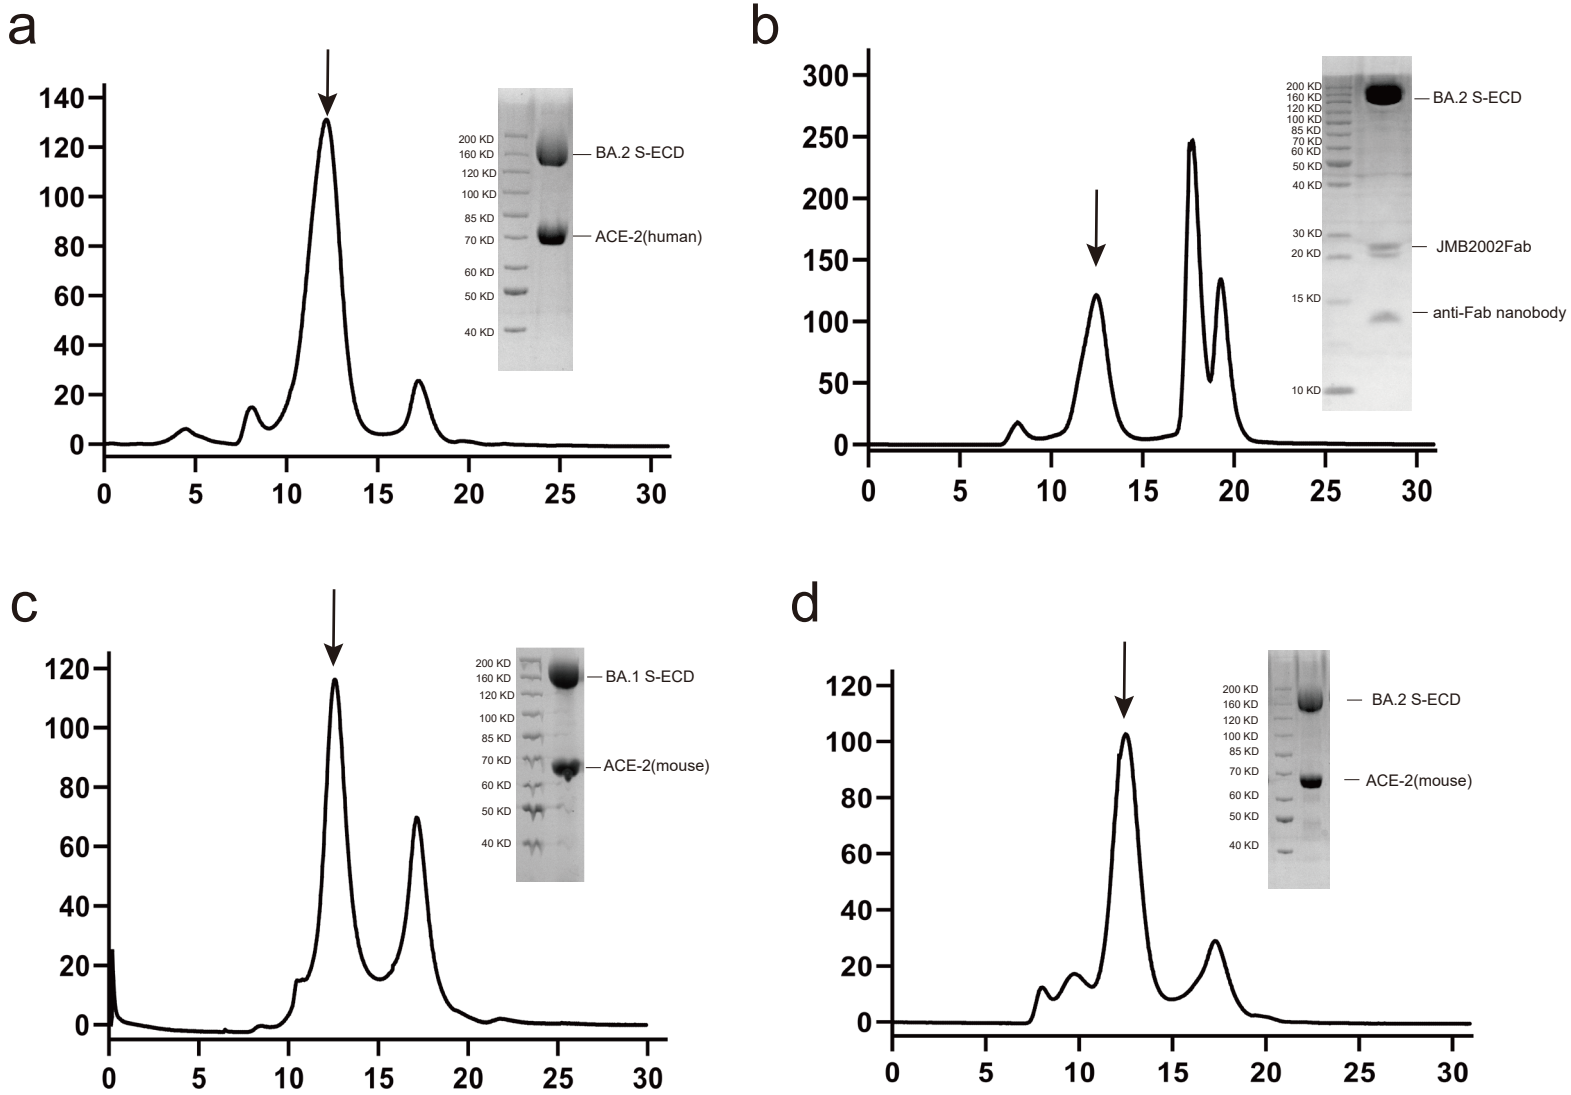

**Fig. S3. Purification and characterization of the Omicron spike protein complex.**

(a-d) Gel filtration profile of the Omicron BA.2 ECD-hACE2 complex (a), Omicron BA.2 ECD-Fab complex (b), Omicron BA.1 ECD-mACE2 complex (c), Omicron BA.2 ECD-mACE2 complex (d), all showing a sharp peak, and corresponding SDS gel showing balanced ratios for each subunit.
