# Supplementary material
Source: PubMed Central journal article supplement (PMC9253133)
Supplement: 41422_2022_672_MOESM5_ESM.pdf [file 41422_2022_672_MOESM5_ESM.pdf]

# Supplementary information, Fig. S5

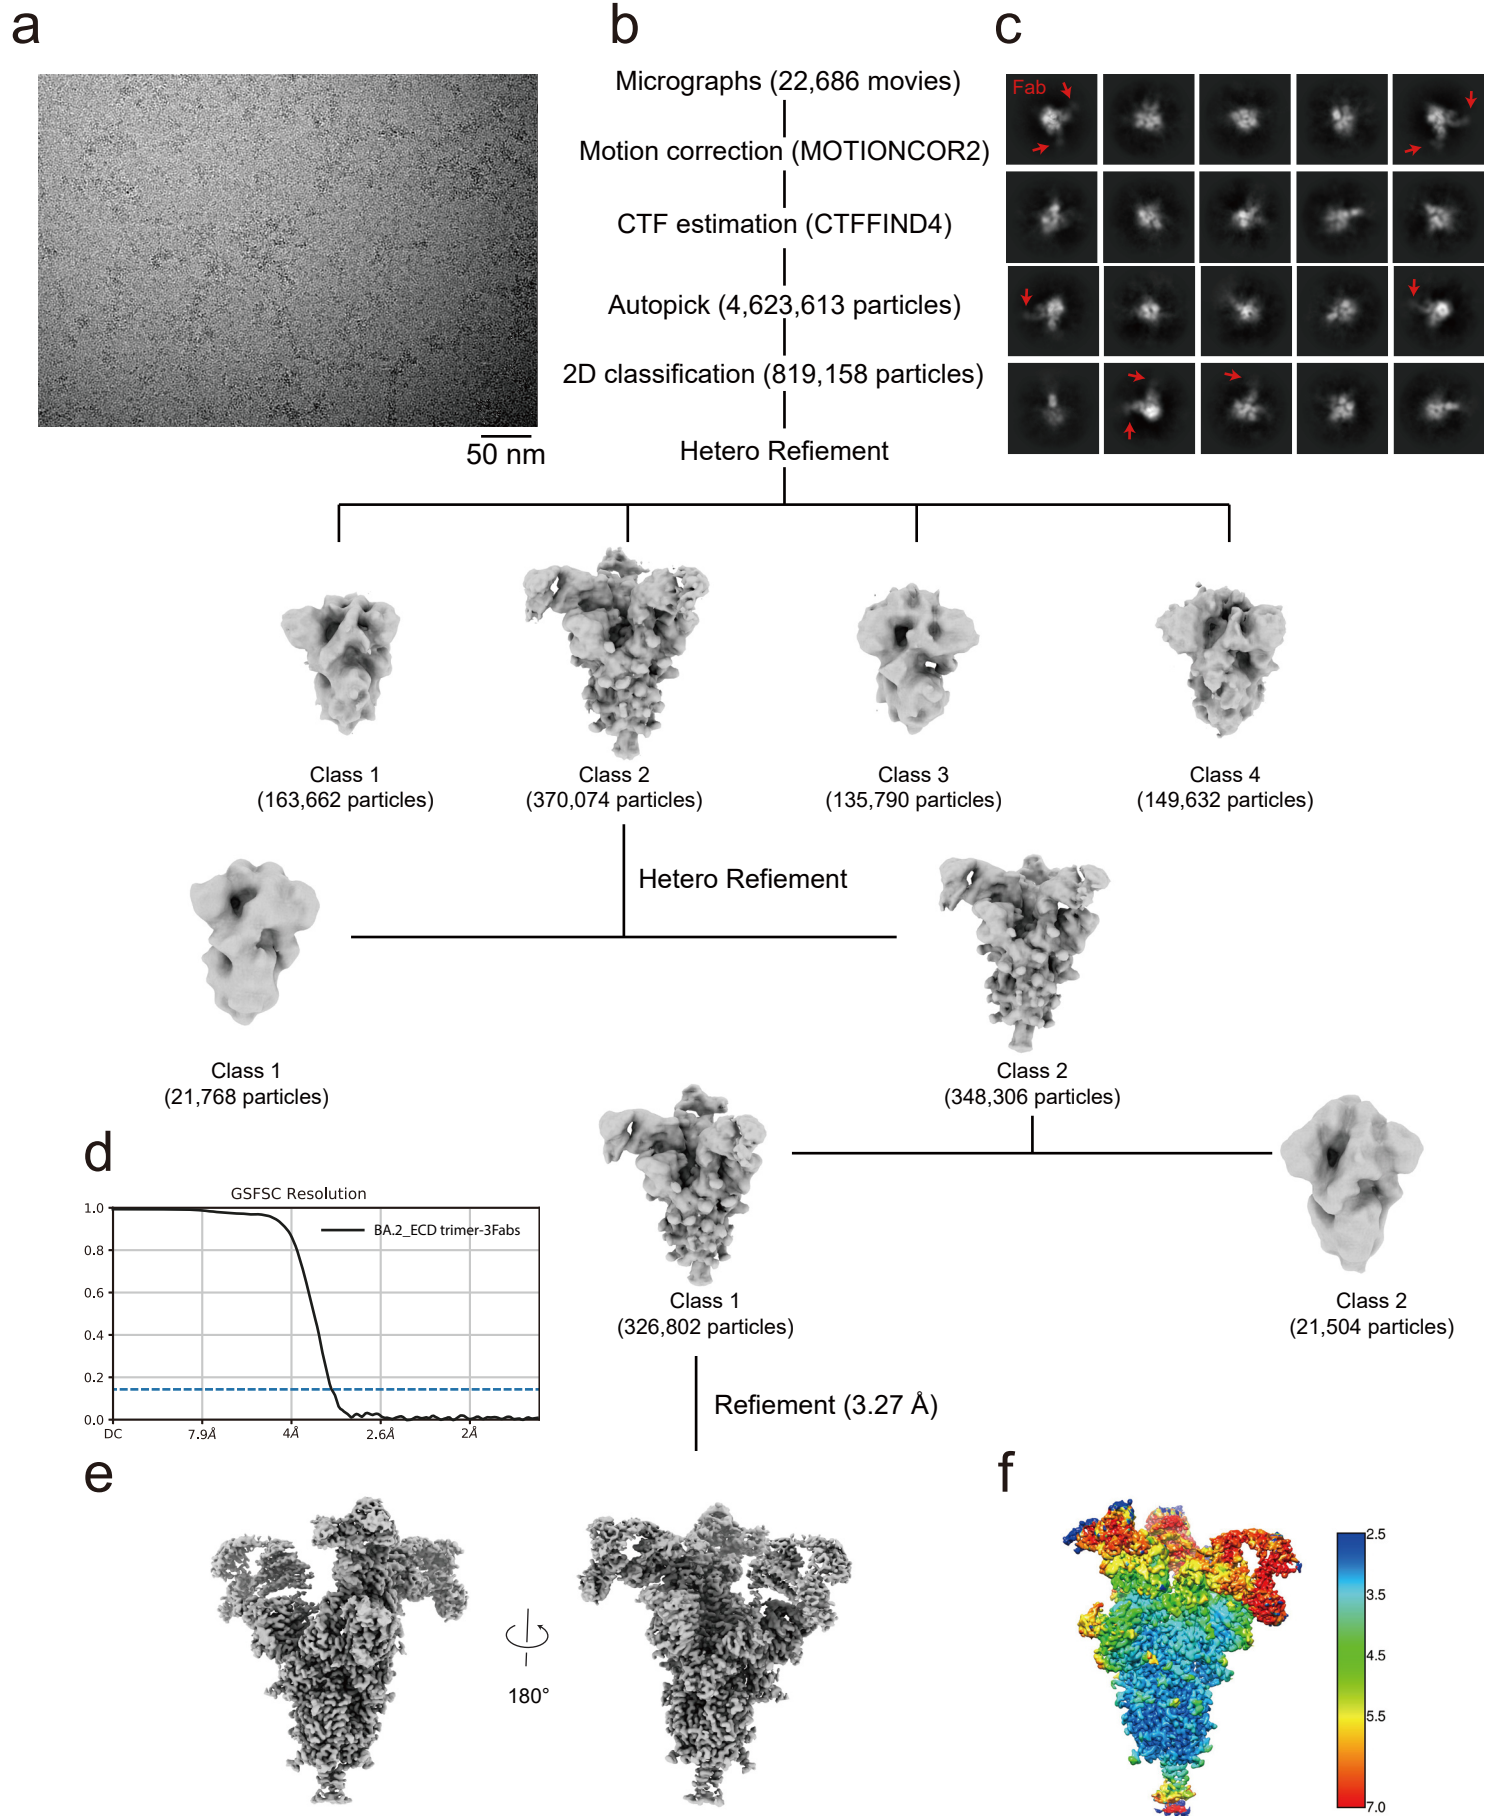

**Fig. S5. Cryo-EM data processing of the Omicron BA.2 ECD-Fab complex.**

(a) A representative cryo-EM micrograph of Omicron BA.2 ECD-Fab complex with 50 nm scale bar included as a size reference. (b) Computational processing of cryo-EM data. (c) Twenty representative reference-free two-dimensional (2D) cryo-EM class averages reveal the Fab density (red arrow). (d) The FSC curves for the reconstructions. (e) The EM maps of Omicron BA.2 ECD trimer-3Fabs in two front views. (f) Local resolution of sub-reconstructions of BA.2 ECD trimer-3Fabs (left panel) and resolution bar is shown in the right panel.
